# Supplementary material
Source: publisher figshare collection journal article supplement (https://acs.figshare.com/ndownloader/files/22819535)
Supplement: Supplementary file 1 [file 22819535]

## Supplementary Information

Synergistic influence of  $d^0$  ( $\text{Nb}^{5+}$ ) and  $d^{10}$  ( $\text{Cd}^{2+}$ ) cations in stabilizing non-centrosymmetric Dion-Jacobson layered perovskites,  $\text{A}'\text{Cd}_2\text{Nb}_3\text{O}_{10}$  ( $\text{A}' = \text{Rb}, \text{Cs}$ )

Shalu Atri, Meenakshi Pokhriyal, and Sitharaman Uma\*

Materials Chemistry Group, Department of Chemistry,  
University of Delhi, Delhi 110007, INDIA

\*Author for correspondence: [suma@chemistry.du.ac.in](mailto:suma@chemistry.du.ac.in)

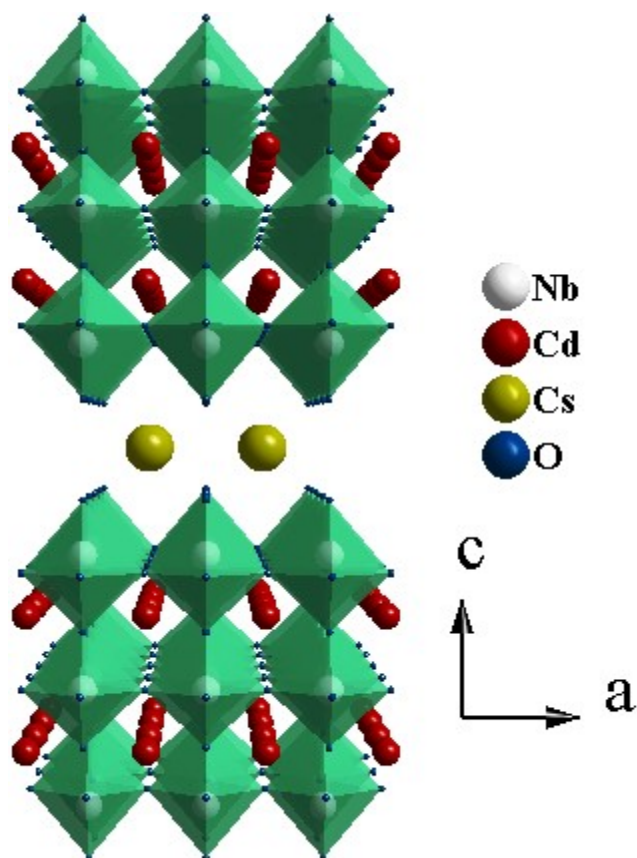

**Figure S1** Crystal structure of  $\text{CsCd}_2\text{Nb}_3\text{O}_{10}$  generated from the solution of single crystal X-ray diffraction measurements.

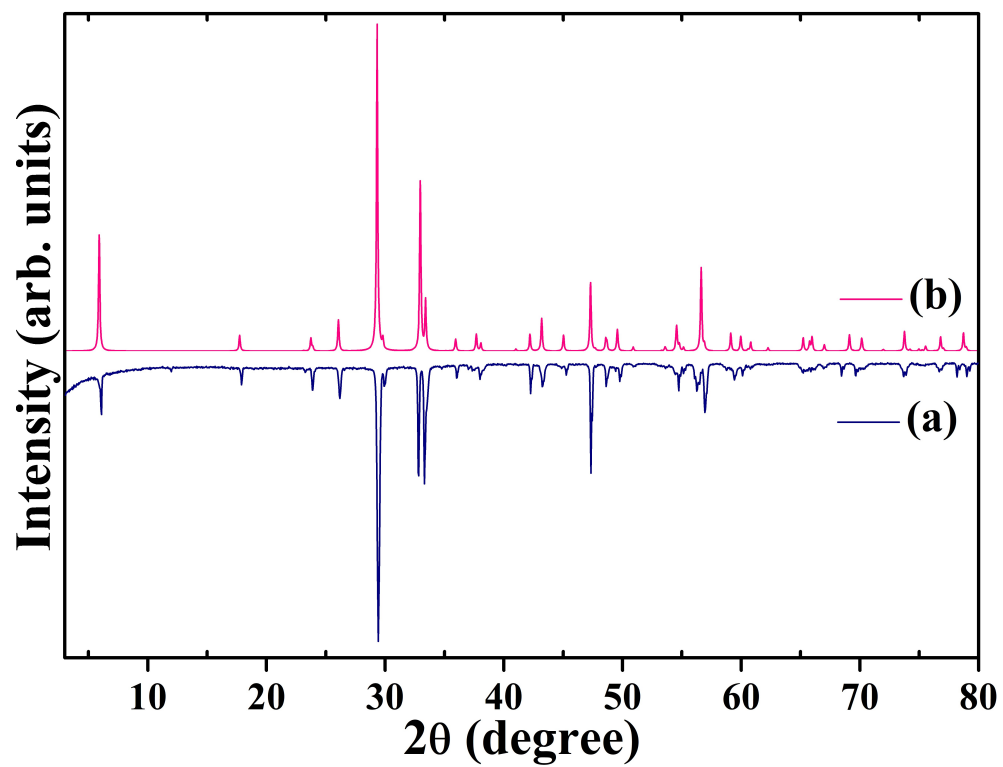

**Figure S2** PXRD patterns (a) obtained for the bulk polycrystalline and (b) simulated using the SXRD solution of  $\text{CsCd}_2\text{Nb}_3\text{O}_{10}$ .

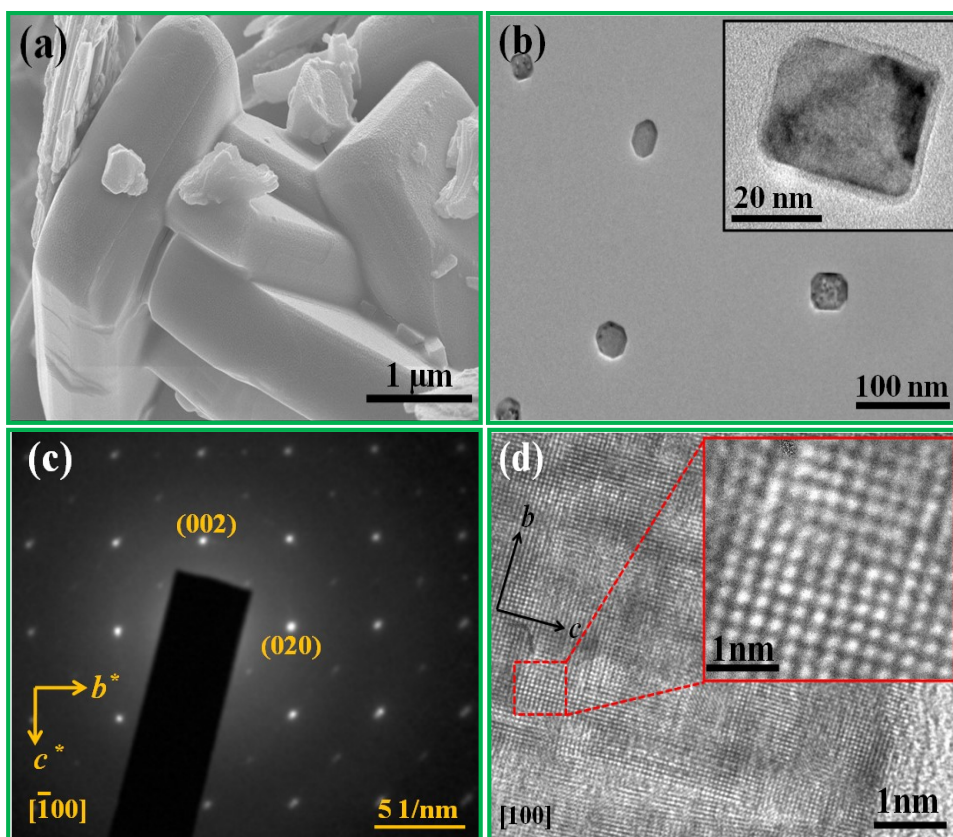

**Figure S3** (a) FESEM, (b) TEM images, (c) SAED along  $[\bar{1}00]$  and (d) HRTEM pattern along  $[100]$  zone axes of  $\text{CsCd}_2\text{Nb}_3\text{O}_{10}$  sample.

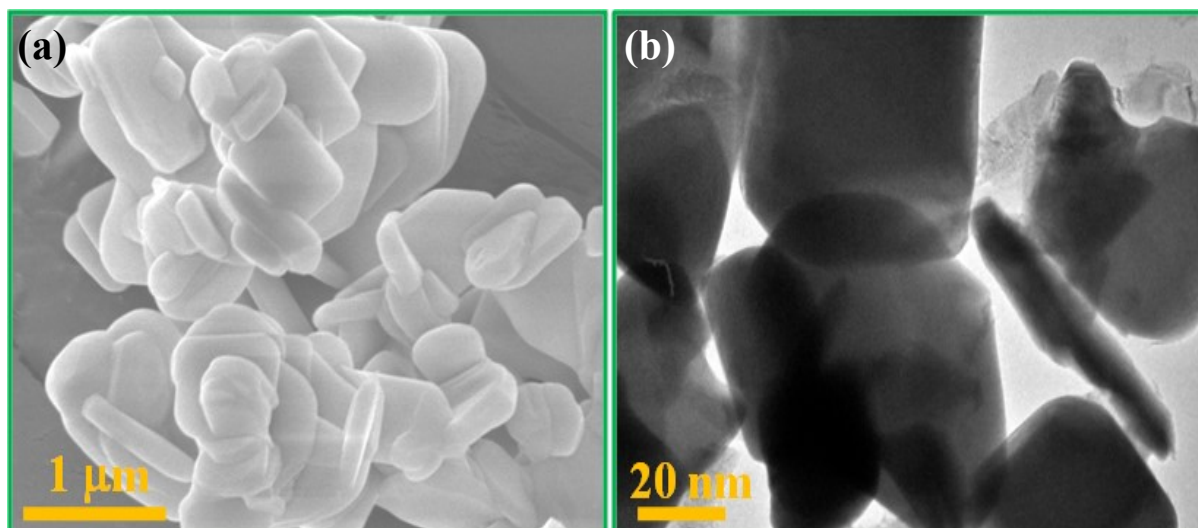

**Figure S4** (a) FESEM and (b) TEM images of  $\text{RbCd}_2\text{Nb}_3\text{O}_{10}$ .



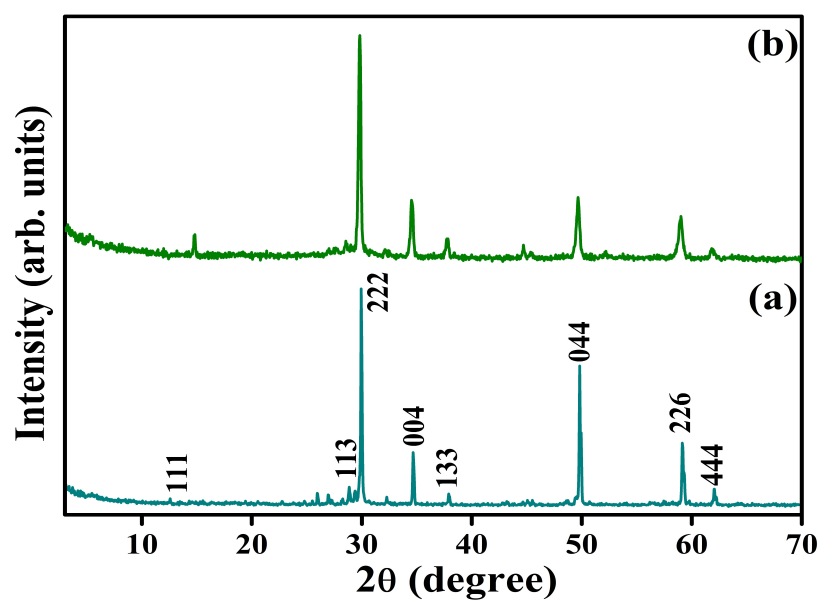

**Figure S5** PXRD pattern of products obtained after calcination of (a)  $\text{RbCd}_2\text{Nb}_3\text{O}_{10}$  and (b)  $\text{CsCd}_2\text{Nb}_3\text{O}_{10}$  at 1075 °C.

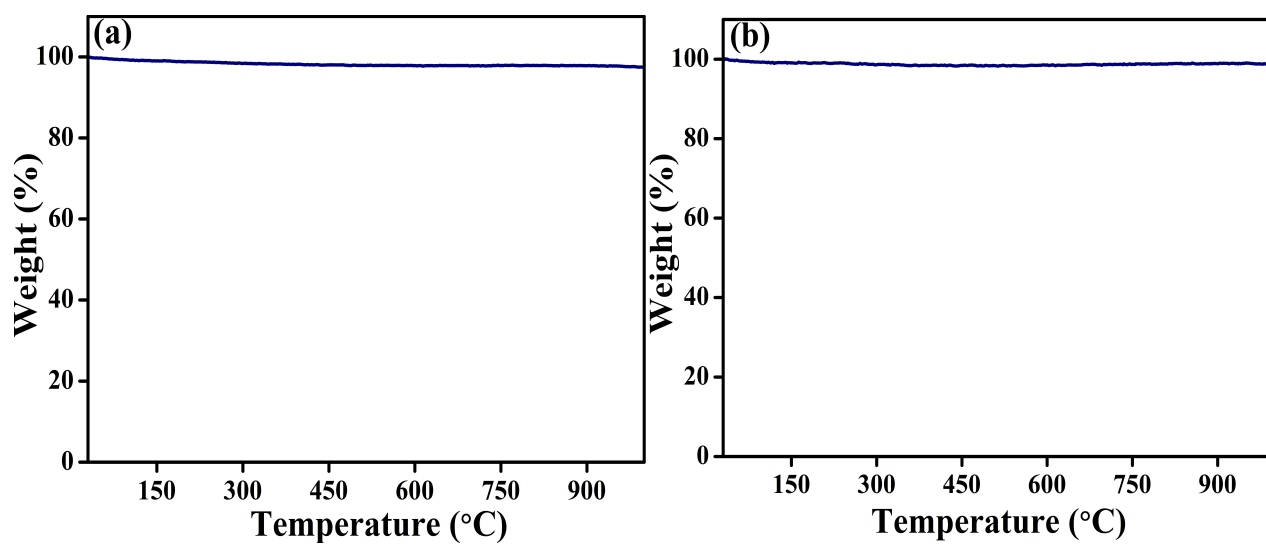

**Figure S6** TG curves for the polycrystalline (a)  $\text{RbCd}_2\text{Nb}_3\text{O}_{10}$  and (b)  $\text{CsCd}_2\text{Nb}_3\text{O}_{10}$  samples.

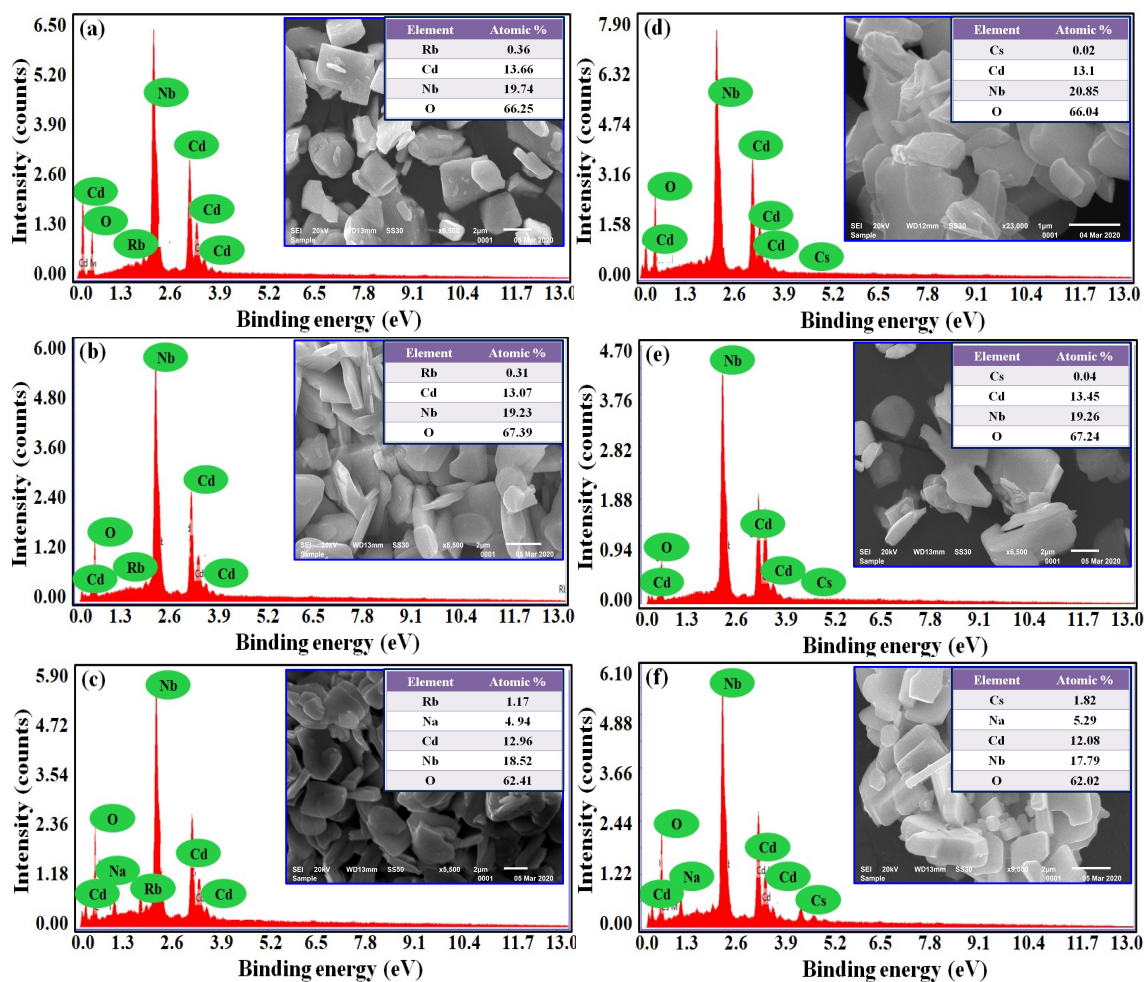

**Figure S7** EDS spectra of (a)  $\text{H}^+$ , (b)  $\text{Li}^+$  and (c)  $\text{Na}^+$ -exchanged products of  $\text{RbCd}_2\text{Nb}_3\text{O}_{10}$ . Inset shows their respective SEM image and elemental analysis table. The corresponding spectra for products obtained from  $\text{CsCd}_2\text{Nb}_3\text{O}_{10}$  are shown in (d), (e) and (f).

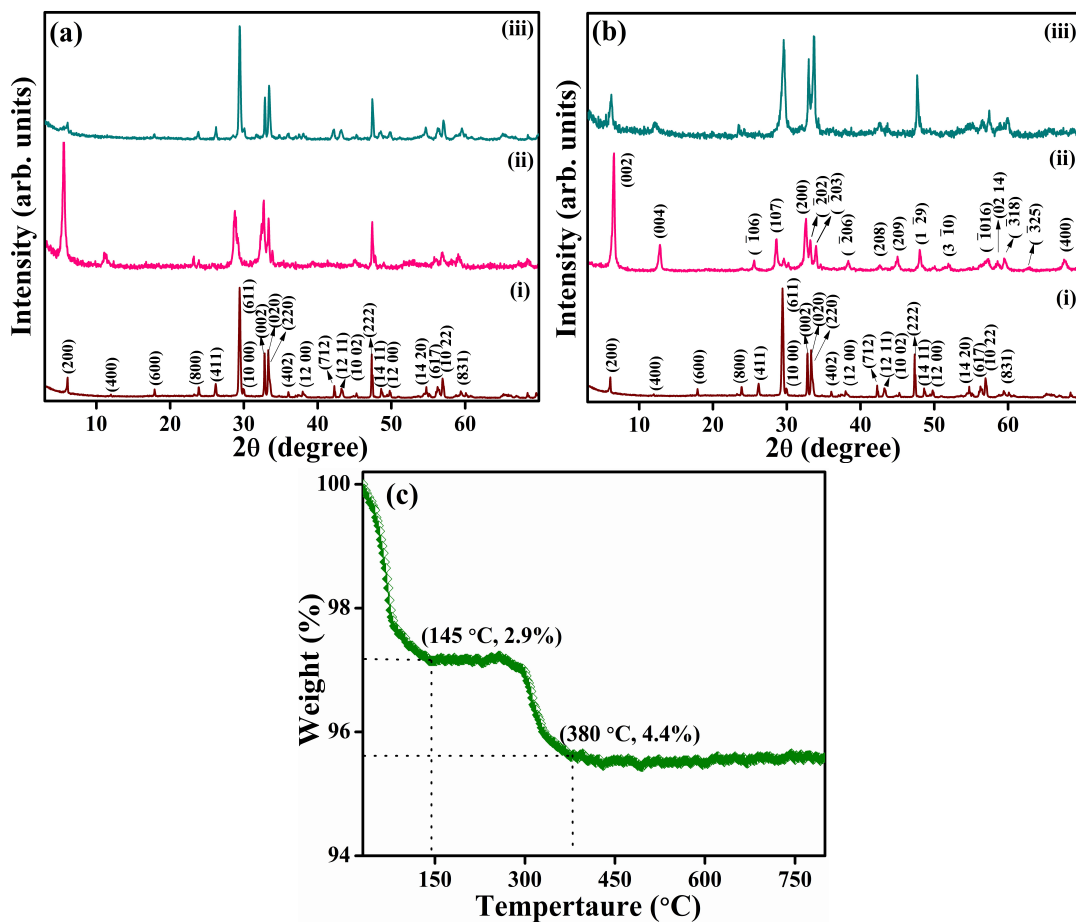

**Figure S8** (a) PXRD patterns of (i)  $\text{CsCd}_2\text{Nb}_3\text{O}_{10}$ , (ii)  $\text{H}^+$ -exchanged and (iii) the regenerated product obtained after treatment of  $\text{H}^+$ -exchanged sample with a solution of 0.5 M  $\text{CsNO}_3$ . (b) PXRD patterns of (i)  $\text{CsCd}_2\text{Nb}_3\text{O}_{10}$ , (ii)  $\text{Li}^+$ -exchanged product and (iii) the regenerated product obtained after treatment of the  $\text{Li}^+$ -exchanged sample with a solution of 0.5 M  $\text{CsNO}_3$ . (c) TG curve for  $\text{H}^+$ -exchanged sample.

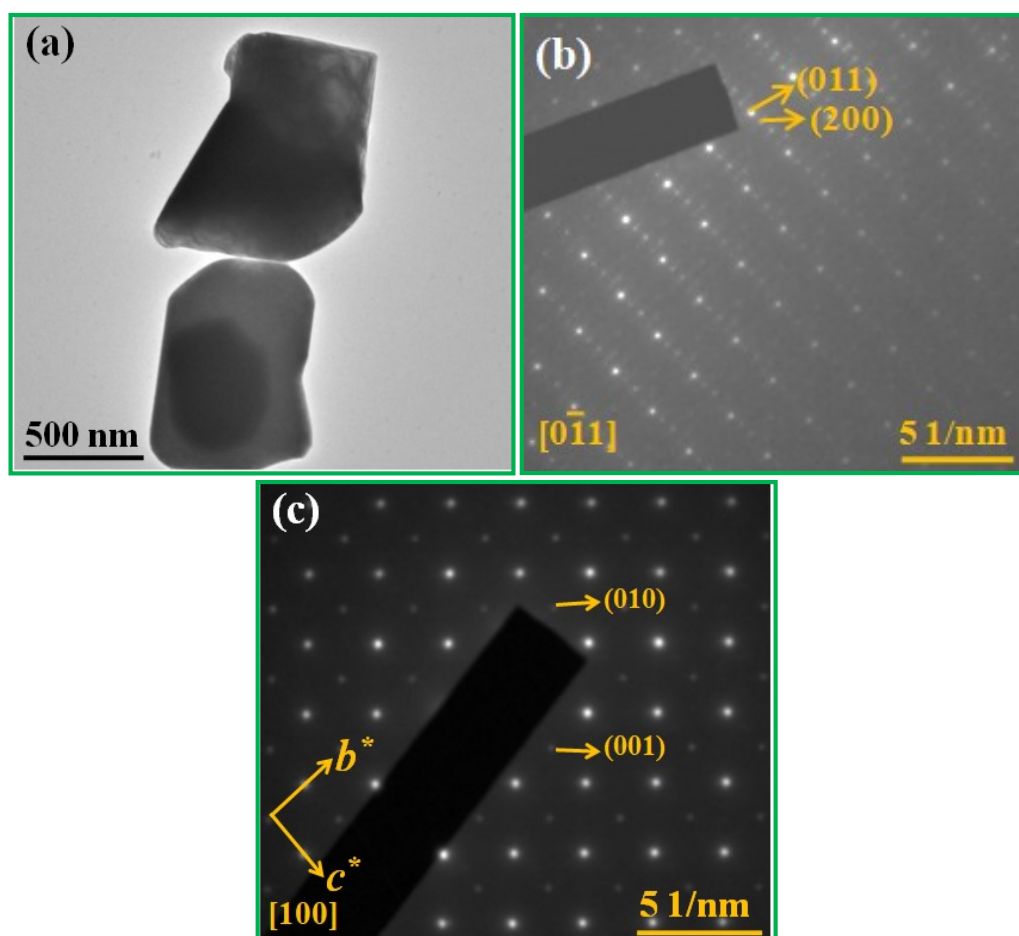

**Figure S9** (a) TEM image and (b) & (c) represents SAED pattern along  $[0\bar{1}1]$  &  $[100]$  zone axes of  $\text{HCD}_2\text{Nb}_3\text{O}_{10}$ .

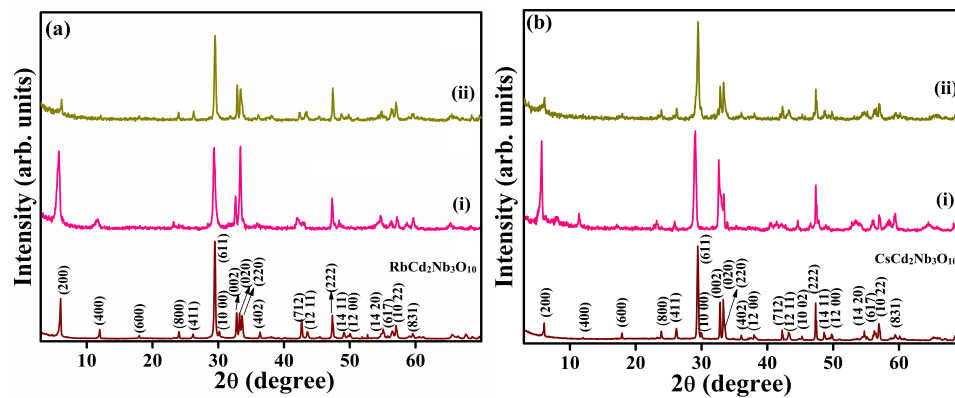

**Figure S10** PXRD patterns of products of ion exchange reactions of (a)  $\text{RbCd}_2\text{Nb}_3\text{O}_{10}$  and (b)  $\text{CsCd}_2\text{Nb}_3\text{O}_{10}$  with (i)  $\text{Na}^+$  ions and (ii)  $\text{K}^+$  ions.

**Table S1** Crystallographic parameters of CsCd<sub>2</sub>Nb<sub>3</sub>O<sub>10</sub> from SXRD

| Crystal Data                                |                                                   |                                                       |                        |
|---------------------------------------------|---------------------------------------------------|-------------------------------------------------------|------------------------|
| <b>Formula</b>                              | CsCd <sub>2</sub> Nb <sub>3</sub> O <sub>10</sub> | <b>Largest diff. peak and hole [e /Å<sup>3</sup>]</b> | 3.22/-5.84             |
| <b>Crystal system</b>                       | Tetragonal                                        | <b>Scan mode</b>                                      | ω scan                 |
| <b>Space Group</b>                          | <i>P4/mmm</i><br>(123)                            | <b>Min/Max Bragg angle [°]</b>                        | 4.0783–29.2618         |
| <b><i>a</i> [Å]</b>                         | 3.8440(8)                                         | <b><i>hkl</i> range</b>                               | -5 → 5, -4 → 4, -18→20 |
| <b><i>b</i> [Å]</b>                         | 3.8440(8)                                         | <b>F(000)</b>                                         | 354                    |
| <b><i>c</i> [Å]</b>                         | 14.990(5)                                         | <b>μ (mm<sup>-1</sup>)</b>                            | 12.576                 |
| <b><i>V</i> [Å<sup>3</sup>]</b>             | 221.51(12)                                        | <b>R<sub>int</sub></b>                                | 0.1068                 |
| <b><i>Z</i></b>                             | 1                                                 | <b>R<sub>sigma</sub></b>                              | 0.0531                 |
| <b>ρ calc [g/cm<sup>3</sup>]</b>            | 5.971                                             | <b>Refinement</b>                                     | F2                     |
| <b>Morphology</b>                           | Rectangular                                       | <b>No. of reflections used</b>                        | 2817                   |
| <b>Colour</b>                               | Colorless                                         | <b>Unique reflections</b>                             | 234                    |
| <b>Dimensions (mm)</b>                      | 0.08× 0.05 ×<br>0.04                              | <b>Number of parameters</b>                           | 19                     |
| <b>Temperature [K]</b>                      | 150(2)                                            | <b>R[F<sup>2</sup>&gt; 2σ(F<sup>2</sup>)]</b>         | 0.0738                 |
| <b>Wavelength [Mo<br/>K<sub>α</sub>][Å]</b> | 0.71073                                           | <b>wR<sub>2</sub></b>                                 | 0.1546                 |
| <b>Monochromator</b>                        | Graphite                                          | <b>GOF</b>                                            | 1.237                  |
| <b>Extinction<br/>Coefficient</b>           | 0.007(3)                                          |                                                       |                        |



**Table S2** Positional and thermal parameters of CsCd<sub>2</sub>Nb<sub>3</sub>O<sub>10</sub> in S.G. *P4/mmm*.

| Atom | Wyckoff position | <i>x/a</i> | <i>y/b</i> | <i>z/c</i> | SOF | U <sub>(iso)</sub> Å <sup>2</sup> |
|------|------------------|------------|------------|------------|-----|-----------------------------------|
| Cs   | 1 <i>d</i>       | 0.5        | 0.5        | 0.5        | 1   | 0.017(1)                          |
| Cd   | 2 <i>h</i>       | -0.5       | -0.5       | 0.1452(1)  | 1   | 0.0129(9)                         |
| Nb1  | 1 <i>a</i>       | 0.0        | 0.0        | 0.0        | 1   | 0.008(1)                          |
| Nb2  | 2 <i>g</i>       | 0.0        | 0.0        | 0.2803(2)  | 1   | 0.013 (1)                         |
| O1   | 2 <i>g</i>       | 0.0        | 0.0        | 0.395(4)   | 1   | 0.062(14)                         |
| O2   | 4 <i>i</i>       | 0.0        | 0.5        | 0.253(3)   | 1   | 0.10 (1)                          |
| O3   | 2 <i>g</i>       | 0.0        | 0.0        | 0.123(6)   | 1   | 0.14 (3)                          |
| O4   | 2 <i>f</i>       | 0.0        | 0.5        | 0.0        | 1   | 0.22(5)                           |

**Table S3** Selected bond distances (in Å) of CsCd<sub>2</sub>Nb<sub>3</sub>O<sub>10</sub> in S.G. *P4/mmm*.

| Atoms      | Bond distance (Å) |
|------------|-------------------|
| Cs–O1 × 8  | 3.14(3)           |
| Nb1–O3 × 2 | 1.85(9)           |
| Nb1–O4 × 4 | 1.9220(4)         |
| Nb2–O1     | 1.72(5)           |
| Nb2–O2 × 4 | 1.964(9)          |
| Nb2–O3     | 2.36(9)           |
| Cd–O2 × 4  | 2.51(3)           |
| Cd–O3 × 4  | 2.73(1)           |
| Cd–O4 × 4  | 2.90(1)           |
